# Supplementary material for: Phosphorescent and semiconductive fiber-like micelles formed by platinum(ii) complexes and block copolymers
Source: Royal Society of Chemistry journal article supplement (doi:10.1039/c7tc04686c), 2017-01-01
Supplement: c7tc04686c1.pdf [file c7tc04686c1.pdf]

## Electronic Supplementary Information

### Phosphorescent and semiconductive fiberlike micelles formed by platinum(II) complexes and block copolymers

Linlin Hu,<sup>a</sup> Fang Qu,<sup>a</sup> Yongyue Wang,<sup>a</sup> Junfang Shen,<sup>b</sup> Qun He,<sup>a</sup> Bin Zhang<sup>\*b</sup> and Weifeng Bu<sup>\*a</sup>

<sup>a</sup> Key Laboratory of Nonferrous Metals Chemistry and Resources Utilization of Gansu Province, State Key Laboratory of Applied Organic Chemistry, and College of Chemistry and Chemical Engineering, Lanzhou University, Lanzhou 730000, China

<sup>b</sup> School of Materials Science & Engineering, Zhengzhou University, Zhengzhou 450002, China

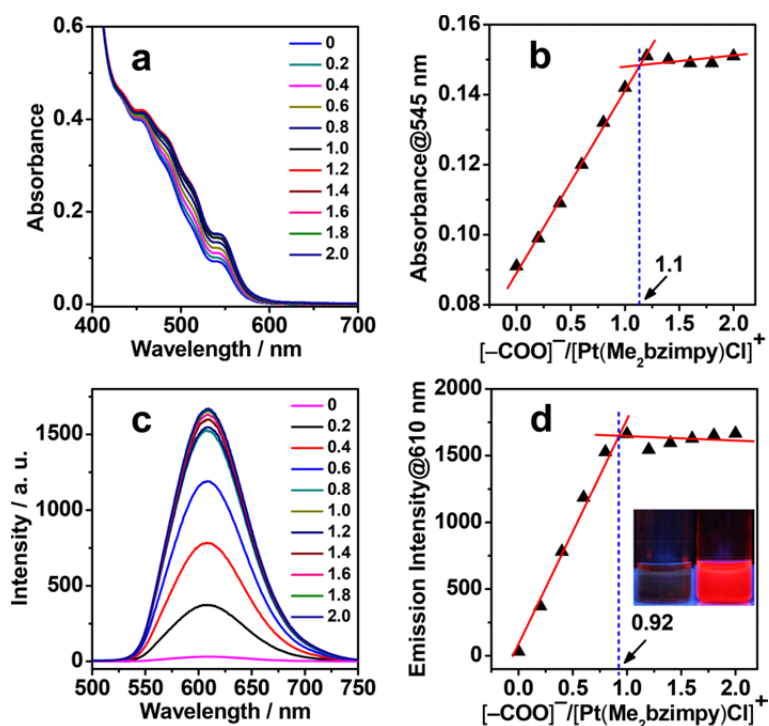

**Fig. S1** UV-vis absorption (a and b) and emission (c and d) spectral changes of  $[\text{Pt}(\text{Me}_2\text{bzimpy})\text{Cl}]^+\text{Cl}^-$  (0.4 mmol/L) upon dropwise addition of  $\text{E}_{136}\text{-b-A}_{28}$  ( $[-\text{COO}^-]/[\text{Pt}(\text{Me}_2\text{bzimpy})\text{Cl}]^+ = 0, 0.2, 0.4, 0.6, 0.8, 1.0, 1.2, 1.4, 1.6, 1.8, \text{ and } 2.0$ ). As revealed in the titration curves of  $[\text{Pt}(\text{Me}_2\text{bzimpy})\text{Cl}]^+\text{Cl}^-/\text{E}_{136}\text{-b-A}_{28}$  (Fig. S1) and  $[\text{Pt}(\text{Me}_2\text{bzimpy})\text{Cl}]^+\text{Cl}^-/\text{E}_{136}\text{-b-A}_{72}$  (Fig. S2), the  $[-\text{COO}^-]/[\text{Pt}(\text{Me}_2\text{bzimpy})\text{Cl}]^+$  molar ratio is not exactly equal to 1.0 like  $[\text{Pt}(\text{Me}_2\text{bzimpy})\text{Cl}]^+\text{Cl}^-/\text{E}_{136}\text{-b-A}_{28}$  (Fig. 2), but rather close to 1.0. This is acceptable when one considers the experimental errors. Alternatively, this slight difference can be attributed to the polydispersity of the  $\text{A}_m$  blocks. The titration experiments of EAPt-1 and EAPt-3 have been repeated for at least ten times and the molar charge ratio was  $1.0 \pm 0.2$ . Even though with the errors, with increasing the “ $m$ ” value, the number of the  $[\text{Pt}(\text{Me}_2\text{bzimpy})\text{Cl}]^+$  group increased steadily in the individual nanofibers ( $28 \pm 5 < 42 < 72 \pm 14$  for EAPt-1, EAPt-2, and EAPt-3, respectively). This order is consistent with the increasing width of the fiberlike micelles.

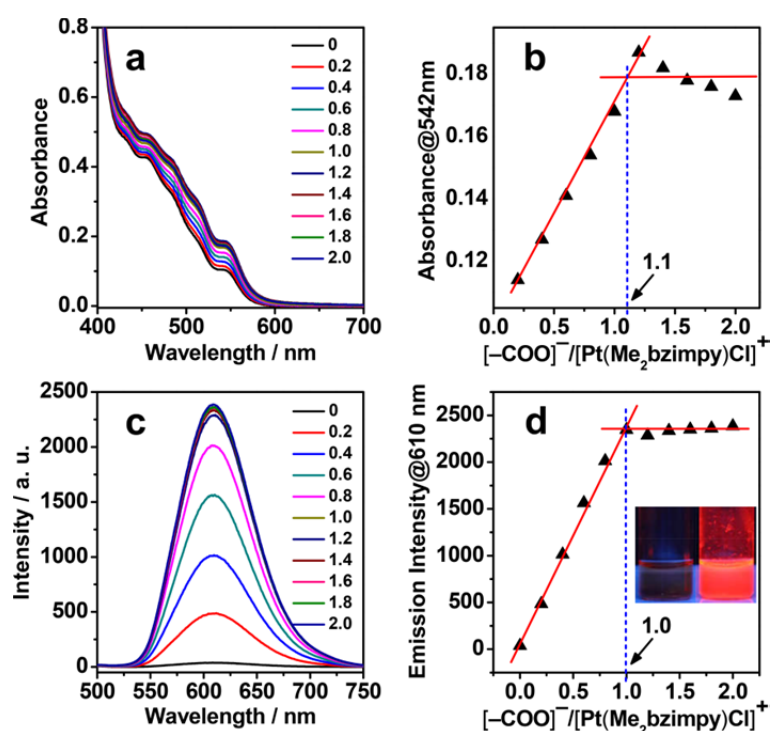

**Fig. S2** UV-vis absorption (a and b) and emission (c and d) spectral changes of  $[\text{Pt}(\text{Me}_2\text{bzimpy})\text{Cl}]^+\text{Cl}^-$  (0.4 mmol/L) upon dropwise addition of  $\text{E}_{136}\text{-b-A}_{72}$  ( $[-\text{COO}]^-/[\text{Pt}(\text{Me}_2\text{bzimpy})\text{Cl}]^+ = 0, 0.2, 0.4, 0.6, 0.8, 1.0, 1.2, 1.4, 1.6, 1.8, \text{ and } 2.0$ ).

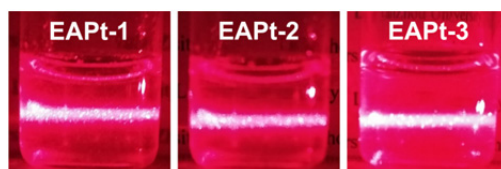

**Fig. S3** The solutions of EAPt-1, EAPt-2, and EAPt-3 showed clear Tyndall effects.

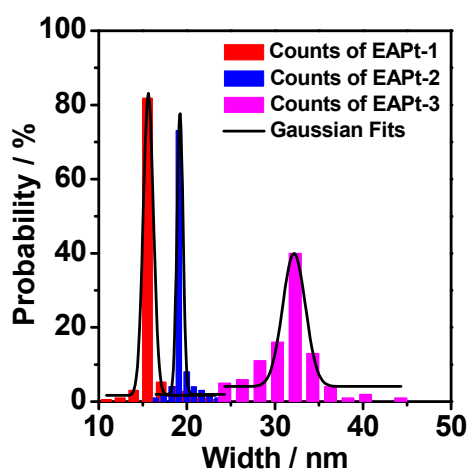

**Fig. S4** The ionic core widths of fiberlike micelles of EAPt-1, EAPt-2, and EAPt-3 were determined to be  $15.6 \pm 1.2$ ,  $19.2 \pm 0.7$ , and  $32.2 \pm 2.6$  nm, respectively, by counting more than 500 nanofibers

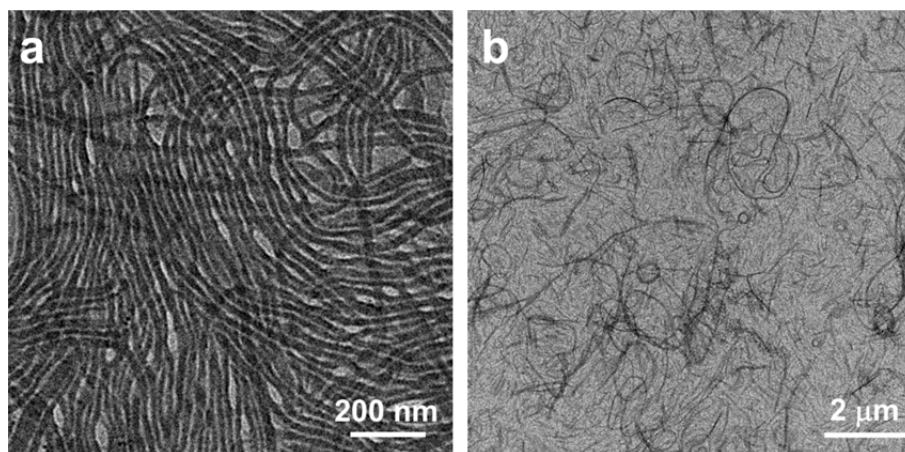

**Fig. S5** TEM images of EAPt-2 (a) and EAPt-3 (b) drop-cast from the 0.4 mmol/L aqueous solutions.

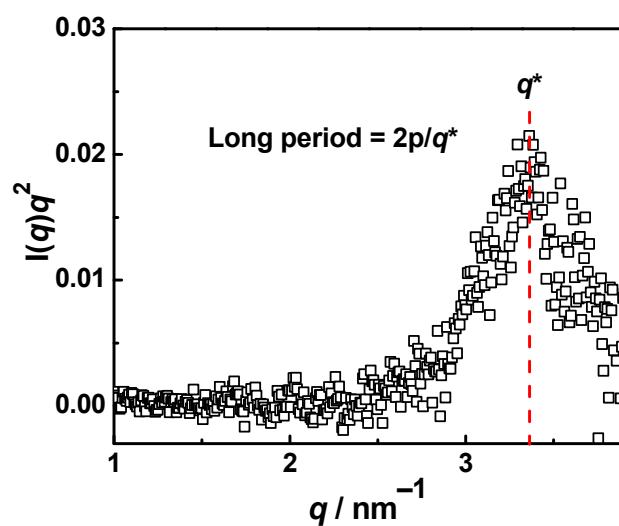

**Fig. S6.** The SAXS curve was calibrated by the Lorentz method to obtain the long period of EAPt-2. A scattering peak appeared at  $q^* = 3.28 \text{ nm}^{-1}$ , corresponding a spacing of  $d$  ( $d = 2\pi/q^* = 1.92 \text{ nm}$ ).

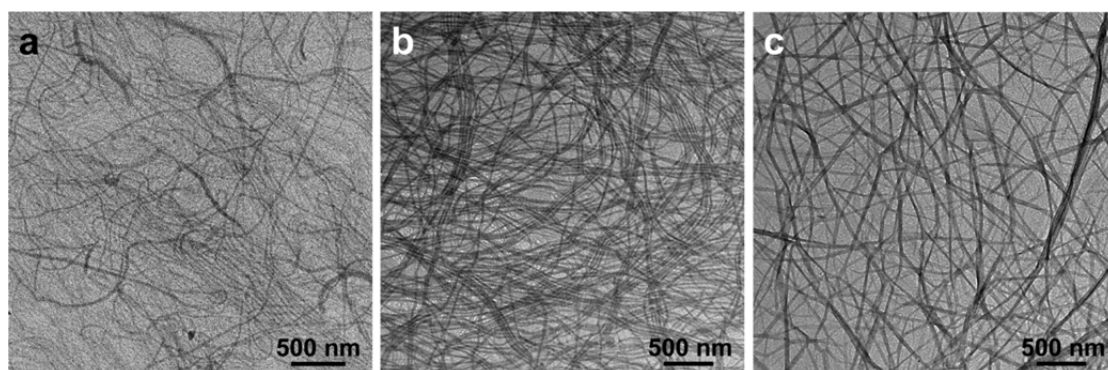

**Fig. S7** TEM images of EAPt-1 (a), EAPt-2 (b), and EAPt-3 (c) drop-cast from the 0.4 mmol/L aqueous solutions that were aged for six months.

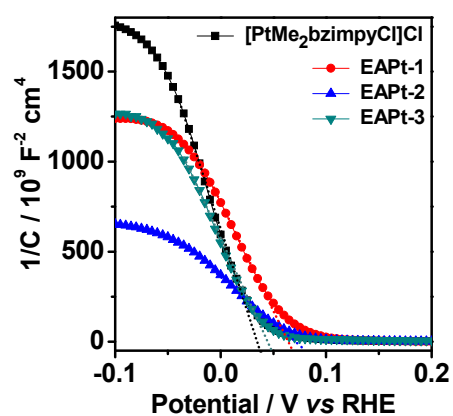

**Fig. S8** Mott-Schottky plots of  $1/C^2$  against potential offered negative slopes, suggesting that these nanofibers were p-type semiconductors.
